# Supplementary material
Source: ML conference proceedings conference paper supplement (https://openaccess.thecvf.com/content/WACV2024/html/Shiota_Egocentric_Action_Recognition_WACV_2024_paper.html)
Supplement: Supplementary file 1 [file Shiota_Egocentric_Action_Recognition_WACV_2024_supplemental.pdf]

# Supplementary Material for Egocentric Action Recognition by Capturing Hand-Object Contact and Object State

Tsukasa Shiota Motohiro Takagi Kaori Kumagai Hitoshi Seshimo Yushi Aono  
NTT Human Informatics Laboratories, NTT Corporation

{tsukasa.shiota, motohiro.takagi, kaori.kumagai, hitoshi.seshimo, yushi.aono}@ntt.com

## 1. Extended Qualitative Analysis

Additional qualitative analysis was done on the EGTEA and MECCANO dataset, *i.e.*, in a cooking and industrial-like domain.

Figure A1 shows example visualizations in a cooking domain. The SlowFast model trained on both the HOCL and OSL methods output the correct action labels; the results show that the model focused on very different aspects of the video depending on whether it was trained on action learning or on HOCL and OSL. Specifically, SlowFast trained on only action learning output a label in response to the food bag, which is unrelated to the fridge or person’s hands. This is evidence that the model was trained to capture irrelevant information without considering hand-object interaction. On the other hand, when SlowFast was constrained to focus on the hands and objects due to being trained on HOCL and OSL, it focused on the fridge and hands to determine the action label. Figure A2 shows additional example visualizations in which the SlowFast correctly predicted the action label under all training conditions. The model without being trained on HOCL and OSL focused only on the point where the left hand holds the condiment container in the second frame of the video, whereas when it was trained on both HOCL and OSL, it focused on all the places where the condiment container is placed.

Figure A3 and A4 show example visualizations in an industrial-like domain. In Figure A3, SlowFast with only action learning incorrectly recognized the action, focusing on “partial\_model,” which is unrelated to “put\_screwdriver.” On the other hand, SlowFast trained on both HOCL and OSL precisely captures the interaction between right hand and screwdriver. Figure A4 shows example visualizations in which the SlowFast correctly predicted the action label under all training conditions. SlowFast with only action learning output a label only focusing on the last frame of the video, which means it does not observe the action of the screw being tightened. When trained on HOCL and OSL, SlowFast understood the action by focusing on the screw-

tightening movements captured throughout the video.

Figure A5 shows example visualizations in which the SlowFast model incorrectly predicted the action label under all training conditions. The ground truth action for this video is “Take eating\_utensil.” SlowFast without HOCL and OSL incorrectly predicted the action as “Take lettuce” due to a strong response to the lettuce in the third frame. SlowFast with OSL output “Divide/Pull Apart lettuce” because it made an incorrect prediction in the second frame, judging that the lettuce and the right hand are in contact even though they are not. The label was predicted to be “Cut lettuce” when HOCL was used alone and when HOCL and OSL were both used. This is because the model recognized that the knife and lettuce interact in the video. Future work includes addressing two challenging issues: (1) making contact determination more accurate by using other modalities and (2) clarifying object-object interaction.

## 2. Extended Discussion of Limitations

**Neither an untrained model nor one trained on the proposed methods can prioritize the actions to be recognized on the current datasets.** We often perform multiple actions simultaneously. For example, we might lift a loaf of bread with our left hand and simultaneously grasp a knife with our right hand to slice it. In this situation, the video shows both “Take bread” and “Take eating\_utensil”; therefore, there are two ground truth actions. However, recognition models cannot determine which action is salient. We show an example of this in Figure A6. In the video, a person holds a knife in his/her right hand while simultaneously lifting a loaf of bread with his/her left hand. The video captures both actions, namely “Take bread” and “Take eating\_utensil”; therefore, two actions are recognized. However, the ground truth label is defined as only “Take eating\_utensil” on the EGTEA dataset [1]. The SlowFast model under all training conditions made incorrect predictions on the action recognition task even though it correctly output the other label, “Take bread.” This may result in in-

correct performance evaluation. Here, we discuss this problem from two perspectives: (1) models and (2) task definition.

(1) If we expect models to correctly identify the most salient action among multiple actions (*e.g.*, “Take eating\_utensil” is more salient than “Take bread”), we need to define saliency and train models to learn the meaning. There are several possible definitions, such as actions that are more centrally imaged in the spatio-temporal direction or hand actions with large movements.

(2) In action recognition, the ground truth label is ultimately determined to be one specific label due to the nature of the action recognition task. With this setting, the performance of the model might not be correctly and sufficiently evaluated. To overcome this limitation, we suggest annotating action labels for the right hand, the left hand, and both hands and redefining them as tasks to predict each action, for example.

### 3. Annotated Adjective Labels

Tables A1, A2, A3, and A4 list the adjectives describing the initial and final states assigned to the action labels in the EGTEA, MECCANO, and EPIC-100 datasets. Due to the enormous number of verb-noun combinations in EPIC-100, we use asterisks to denote noun labels in Tables A3 and A4. Actions other than hand-related actions, such as those using the eyes (*e.g.*, check\_booklet in MECCANO) and actions expressed with an intransitive verb (*e.g.*, walk \* in EPIC-100), do not involve a change in object state. In those cases, we define the initial and final states as “none.” Note that the cost of annotating adjective labels is lower than that of annotating other labels, such as action labels, because they are allocated to each action label rather than to each instance.

### References

- [1] Yin Li, Miao Liu, and James M. Rehg. In the Eye of Beholder: Joint Learning of Gaze and Actions in First Person Video. In *Proceedings of the European Conference on Computer Vision (ECCV)*, 2018. 1
- [2] Ramprasaath R. Selvaraju, Michael Cogswell, Abhishek Das, Ramakrishna Vedantam, Devi Parikh, and Dhruv Batra. Grad-CAM: Visual Explanations from Deep Networks via Gradient-Based Localization. In *Proceedings of the IEEE International Conference on Computer Vision (ICCV)*, pages 618–626, 2017. 3, 4, 5

SlowFast (HOCL: ✗, OSL: ✗) predicts this video as “Open fridge,” focusing on irrelevant object.

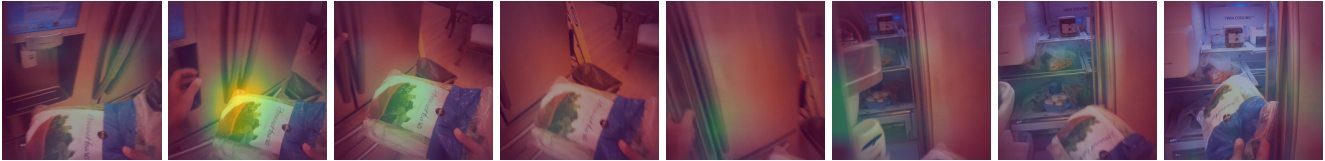

SlowFast (HOCL: ✓, OSL: ✗) predicts this video as “Open fridge,” capturing contact between left hand and fridge.

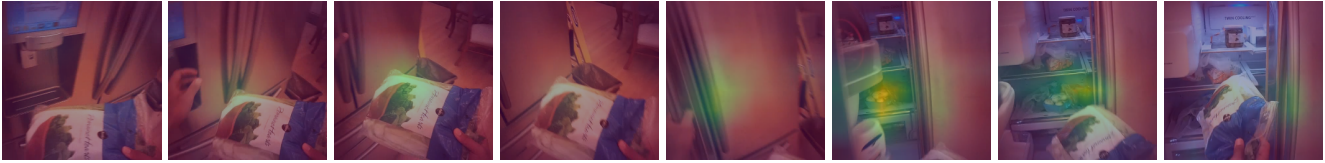

SlowFast (HOCL: ✗, OSL: ✓) predicts this video as “Open fridge,” noticing open state of fridge.

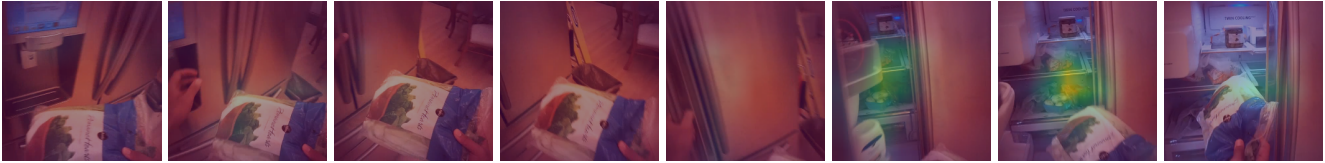

SlowFast (HOCL: ✓, OSL: ✓) predicts this video as “Open fridge,” being aware of action.

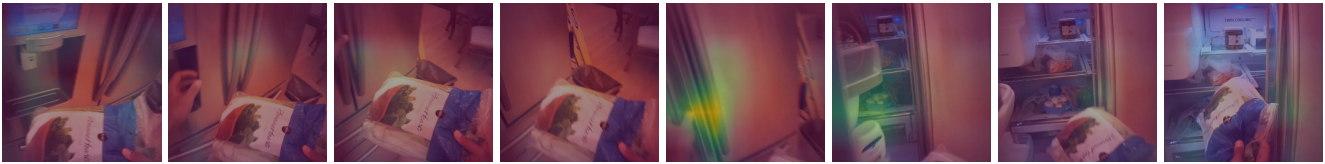

Figure A1. Visualization using GradCAM [2]. This video shows the action “Open fridge,” in which a person opens a fridge with his/her left hand.

SlowFast (HOCL: ✗, OSL: ✗) predicts this video as “Put condiment\_container,” capturing only grasped condiment container.

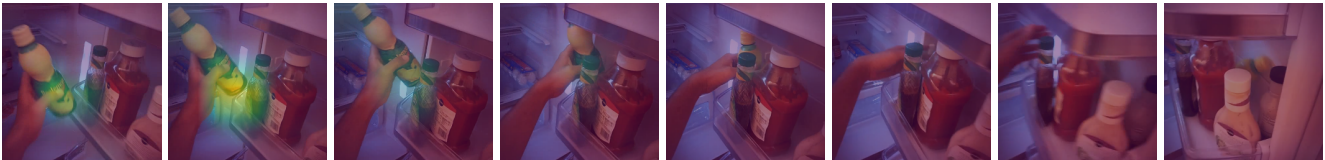

SlowFast (HOCL: ✓, OSL: ✗) predicts this video as “Put condiment\_container,” focusing on hand-object contact.

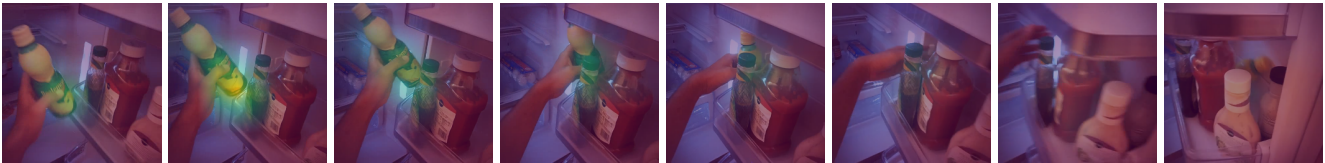

SlowFast (HOCL: ✗, OSL: ✓) predicts this video as “Put condiment\_container,” being aware that condiment container has been “put”.

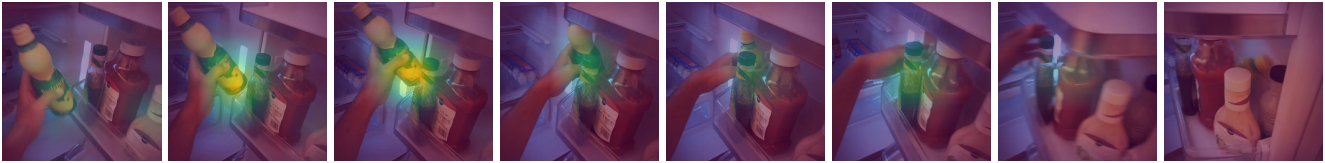

SlowFast (HOCL: ✓, OSL: ✓) predicts this video as “Put condiment\_container,” capturing the action.

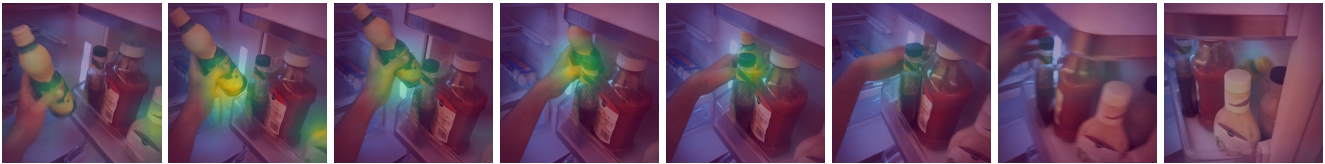

Figure A2. Visualization using GradCAM [2]. This video shows the action “Put condiment\_container,” in which a person puts a condiment container in the storage compartment of the fridge door with his/her left hand.



SlowFast (HOCL: ✗, OSL: ✗) predicts this video as “take\_partial\_model,” focusing on irrelevant object.

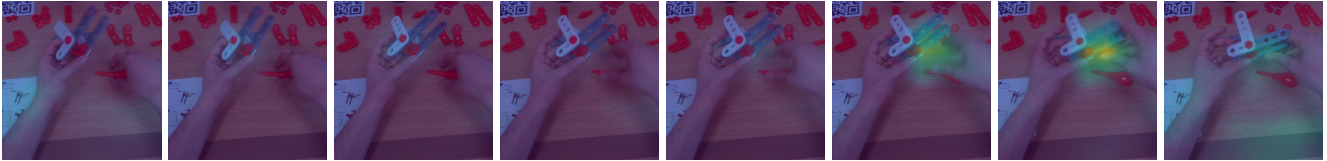

SlowFast (HOCL: ✓, OSL: ✗) predicts this video as “put\_screwdriver,” capturing contact between right hand and screwdriver.

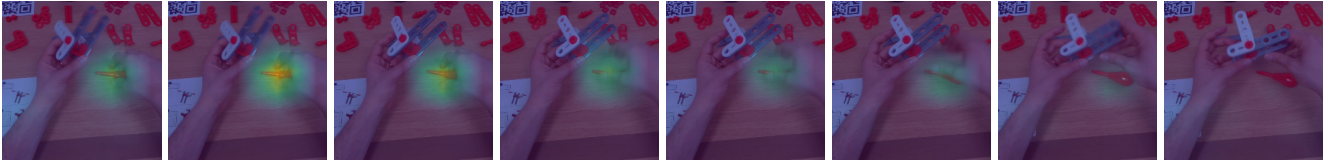

SlowFast (HOCL: ✗, OSL: ✓) predicts this video as “put\_screwdriver,” noticing the object state changes.

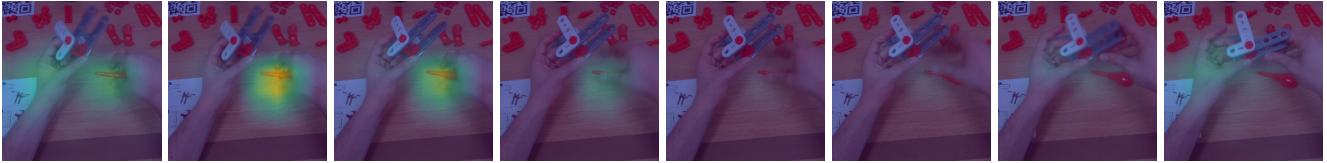

SlowFast (HOCL: ✓, OSL: ✓) predicts this video as “put\_screwdriver,” being aware of action.

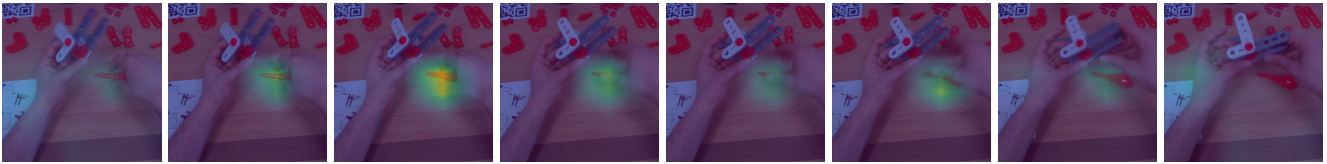

Figure A3. Visualization using GradCAM [2]. This video shows the action “put\_screwdriver,” in which a person puts a screwdriver with his/her right hand.

SlowFast (HOCL: ✗, OSL: ✗) predicts this video as “screw\_screw\_with\_hands,” capturing only grasped screw.

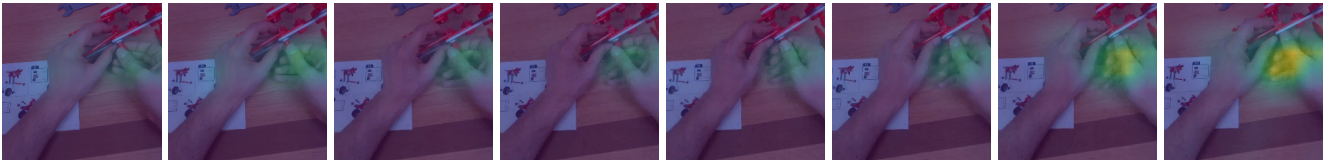

SlowFast (HOCL: ✓, OSL: ✗) predicts this video as “screw\_screw\_with\_hands,” focusing on hand-object contact.

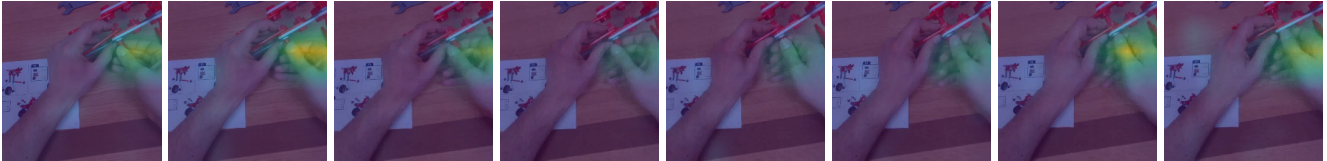

SlowFast (HOCL: ✗, OSL: ✓) predicts this video as “screw\_screw\_with\_hands,” being aware that screw has been “screwed”.

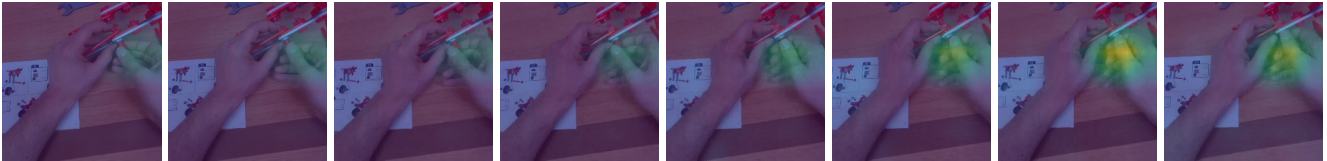

SlowFast (HOCL: ✓, OSL: ✓) predicts this video as “screw\_screw\_with\_hands,” capturing screwing screw with his/her right hand.

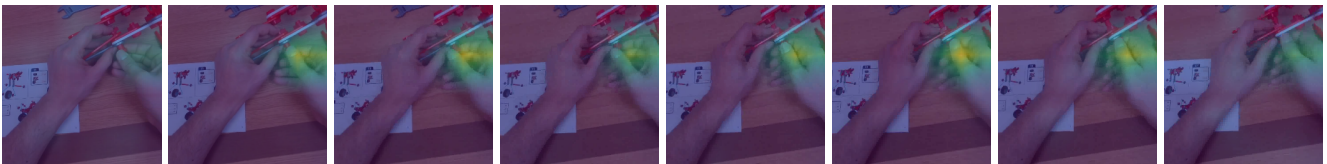

Figure A4. Visualization using GradCAM [2]. This video shows the action “screw\_screw\_with\_hands,” in which a person screws a screw with his/her right hand.



SlowFast (HOCL:  $\times$ , OSL:  $\times$ ) predicts this video as “Take lettuce,” capturing only lettuce.

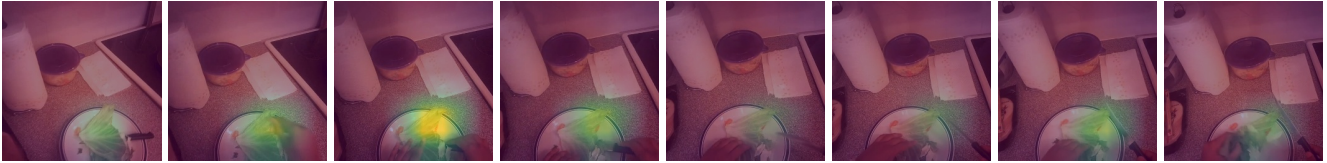

SlowFast (HOCL:  $\checkmark$ , OSL:  $\times$ ) predicts this video as “Cut lettuce,” capturing wrong spatio-temporal regions.

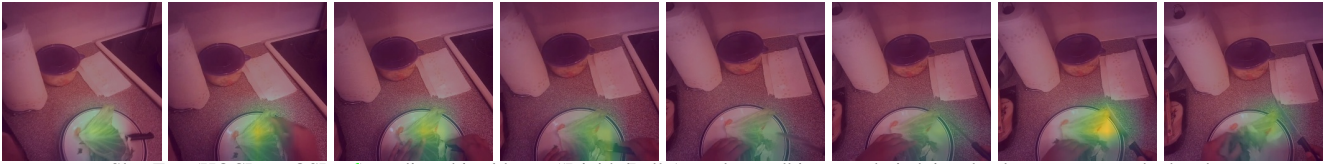

SlowFast (HOCL:  $\times$ , OSL:  $\checkmark$ ) predicts this video as “Divide/Pull Apart lettuce,” incorrectly judging that lettuce was torn by hand.

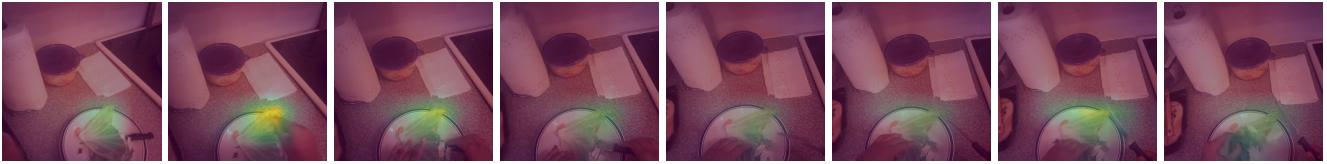

SlowFast (HOCL:  $\checkmark$ , OSL:  $\checkmark$ ) predicts this video as “Cut lettuce,” capturing wrong spatio-temporal regions.

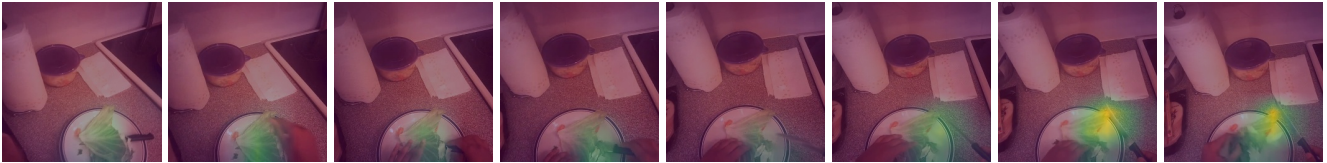

Figure A5. Visualization using GradCAM [2]. The video shows the action “Take eating\_utensil,” in which a person pick up knife with his/her right hand.

SlowFast (HOCL:  $\times$ , OSL:  $\times$ ) predicts this video as “Take bread,” focusing on bread.

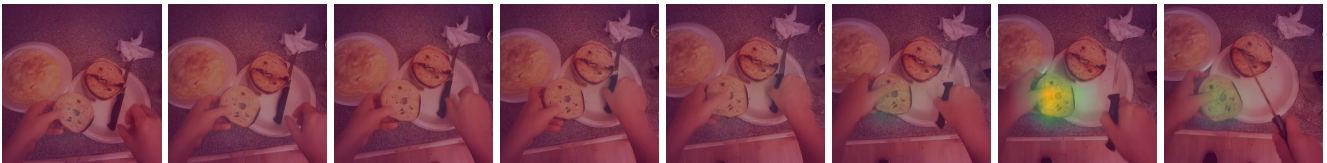

SlowFast (HOCL:  $\checkmark$ , OSL:  $\times$ ) predicts this video as “Take bread,” capturing contact between left hand and bread.

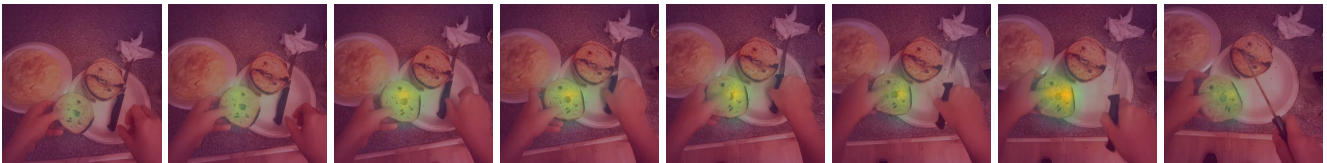

SlowFast (HOCL:  $\times$ , OSL:  $\checkmark$ ) predicts this video as “Take bread,” being aware that state of bread has changed.

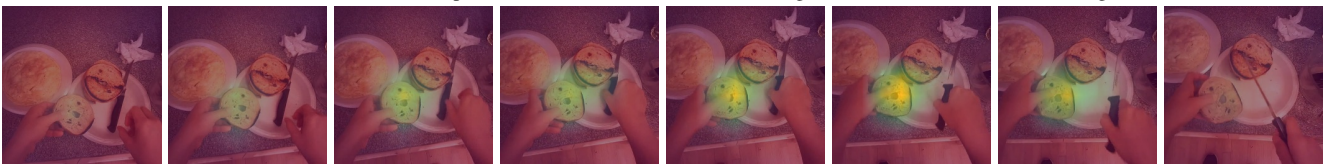

SlowFast (HOCL:  $\checkmark$ , OSL:  $\checkmark$ ) predicts this video as “Take bread,” capturing that person is lifting up bread.

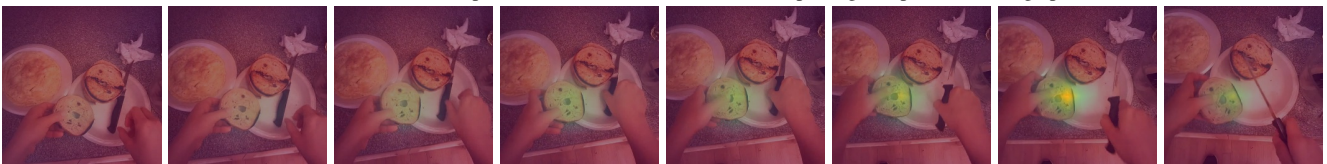

Figure A6. Visualization using GradCAM [2]. The video shows two actions, “Take bread” and “Take eating\_utensil,” in which a person simultaneously picks up loaf of bread with his/her left hand and knife with his/her right hand.

Table A1. Annotated adjective labels for action labels in EGTEA dataset.

| Initial state | Final state | Action labels                                                                                                                                                                                                                                                                                                                                                                                                                                    |
|---------------|-------------|--------------------------------------------------------------------------------------------------------------------------------------------------------------------------------------------------------------------------------------------------------------------------------------------------------------------------------------------------------------------------------------------------------------------------------------------------|
| closed        | open        | Open fridge, Open cabinet, Open drawer, Open condiment_container, Open fridge_drawer, Open dishwasher, Open bread_container, Open oil_container, Open cheese_container, Turn on faucet                                                                                                                                                                                                                                                           |
| open          | closed      | Close fridge, Close cabinet, Close condiment_container, Close drawer, Close fridge_drawer, Close oil_container, Turn off faucet                                                                                                                                                                                                                                                                                                                  |
| put           | grasped     | Take eating_utensil, Take condiment_container, Take plate, Take bowl, Take paper_towel, Take cooking_utensil, Take bread, Take seasoning_container, Take cup, Take pot, Take bread_container, Take tomato, Take pan, Take sponge, Take lettuce, Take onion, Take cheese_container, Take oil_container, Take cucumber, Take bell_pepper, Take tomato_container, Take pasta_container, Take grocery_bag, Take cheese, Take cutting_board, Take egg |
| grasped       | put         | Put eating_utensil, Put condiment_container, Put bowl, Put “trash, trash_container,” Put plate, Put cooking_utensil, Put pan, Put lettuce, Put pot, Put bread, Put tomato, Put cup, Put bread_container, Put sponge, Put seasoning_container, Put cutting_board, Put cheese, Put bell_pepper, Put tomato_container, Put paper_towel, Put cucumber, Put cheese_container, Put onion, Put grocery_bag, Put oil_container                           |
| unsqueezed    | squeezed    | Squeeze washing_liquid, Squeeze sponge                                                                                                                                                                                                                                                                                                                                                                                                           |
| whole         | cut         | Cut tomato, Cut cucumber, Cut carrot, Cut onion, Cut bell_pepper, Cut lettuce, Cut olive                                                                                                                                                                                                                                                                                                                                                         |
| empty         | filled      | Pour “oil, oil_container, pan,” Pour “condiment, condiment_container, salad,” Pour “seasoning, seasoning_container, salad,” Pour “water, faucet, pot”                                                                                                                                                                                                                                                                                            |
| whole         | mixed       | Mix egg                                                                                                                                                                                                                                                                                                                                                                                                                                          |
| dirty         | clean       | Wash eating_utensil, Wash hand, Wash cutting_board, Wash pan, Wash bowl, Wash pot, Wash strainer, Clean/Wipe counter                                                                                                                                                                                                                                                                                                                             |
| gathered      | spread      | Spread “condiment, bread, eating_utensil”                                                                                                                                                                                                                                                                                                                                                                                                        |
| separated     | mixed       | Mix “mixture, eating_utensil,” Mix pasta                                                                                                                                                                                                                                                                                                                                                                                                         |
| separated     | compressed  | Compress sandwich                                                                                                                                                                                                                                                                                                                                                                                                                                |
| grasped       | grasped     | Move Around bacon, Move Around patty, Move Around pan, Move Around eating_utensil, Move Around bowl, Move Around pot                                                                                                                                                                                                                                                                                                                             |
| non-operated  | operated    | Operate stove, Operate microwave                                                                                                                                                                                                                                                                                                                                                                                                                 |
| whole         | separated   | Divide/Pull Apart lettuce, Divide/Pull Apart paper_towel, Divide/Pull Apart onion, Crack egg                                                                                                                                                                                                                                                                                                                                                     |
| none          | none        | Inspect/Read recipe                                                                                                                                                                                                                                                                                                                                                                                                                              |

Table A2. Annotated adjective labels for action labels in MECCANO dataset.

| <b>Initial state</b> | <b>Final state</b> | <b>Action labels</b>                                                                                                                                                                                                                                                                                                                                                                                                                       |
|----------------------|--------------------|--------------------------------------------------------------------------------------------------------------------------------------------------------------------------------------------------------------------------------------------------------------------------------------------------------------------------------------------------------------------------------------------------------------------------------------------|
| put                  | grasped            | take_red_perforated_bar, take_screw, take_bolt, take_screwdriver,<br>take_red_angled_perforated_bar, take_rod, take_red_perforated_junction_bar,<br>take_partial_model, take_washer, take_tire, take_rim, take_roller, take_gray_perforated_bar,<br>take_gray_angled_perforated_bar, take_white_angled_perforated_bar, take_booklet,<br>take_wheels_axle, take_red_4_perforated_junction_bar, take_handlebar, take_wrench,<br>take_objects |
| unplugged            | plugged            | plug_screw, plug_rod, plug_handlebar                                                                                                                                                                                                                                                                                                                                                                                                       |
| separated            | aligned            | align_objects, align_screwdriver_to_screw, align_wrench_to_bolt                                                                                                                                                                                                                                                                                                                                                                            |
| grasped              | put                | put_booklet, put_screw, put_screwdriver, put_partial_model, put_roller, put_washer,<br>put_red_4_perforated_junction_bar, put_wheels_axle, put_gray_perforated_bar, put_handlebar,<br>put_red_perforated_bar, put_red_angled_perforated_bar, put_bolt,<br>put_white_angled_perforated_bar, put_rod, put_gray_angled_perforated_bar,<br>put_red_perforated_junction_bar, put_rim, put_wrench, put_tire, put_objects                         |
| loosed               | tightened          | tighten_bolt_with_hands, screw_screw_with_screwdriver, screw_screw_with_hands,<br>tighten_bolt_with_wrench                                                                                                                                                                                                                                                                                                                                 |
| attached             | detached           | pull_partial_model, pull_screw, pull_rod                                                                                                                                                                                                                                                                                                                                                                                                   |
| unflipped            | flipped            | browse_booklet                                                                                                                                                                                                                                                                                                                                                                                                                             |
| tightened            | loosed             | unscrew_screw_with_hands, unscrew_screw_with_screwdriver, loosen_bolt_with_hands                                                                                                                                                                                                                                                                                                                                                           |
| detached             | attached           | fit_rim_tire                                                                                                                                                                                                                                                                                                                                                                                                                               |
| none                 | none               | check_booklet                                                                                                                                                                                                                                                                                                                                                                                                                              |



Table A3. Annotated adjective labels for action labels in EPIC-100 dataset (1/2).

| Initial state | Final state | Action labels                                                                      |
|---------------|-------------|------------------------------------------------------------------------------------|
| put           | grasped     | take *                                                                             |
| dirty         | clean       | scrub *, filter *, wash *, brush *                                                 |
| closed        | open        | open *                                                                             |
| open          | closed      | close *                                                                            |
| turned-off    | turned-on   | turn-on *                                                                          |
| whole         | cut         | cut *                                                                              |
| turned-on     | turned-off  | turn-off *                                                                         |
| empty         | filled      | pour *, fill *                                                                     |
| separated     | mix         | mix *                                                                              |
| grasped       | grasped     | use *, pull *, shake *, stretch *, carry *, slide *, lift *, move *, pat *, hold * |
| grasped       | put         | eat *, put *, drink *, insert *, let-go *                                          |
| gathered      | separated   | remove *                                                                           |
| grasped       | thrown      | throw *                                                                            |
| wet           | dried       | dry *                                                                              |
| unscooped     | scooped     | scoop *                                                                            |
| unoperated    | operated    | adjust *                                                                           |
| unsqueezed    | squeezed    | squeeze *                                                                          |
| unpeeled      | peeled      | peel *                                                                             |
| filled        | empty       | empty *                                                                            |
| unpressed     | pressed     | press *                                                                            |
| unflipped     | flipped     | flip *                                                                             |
| unturned      | turned      | turn *                                                                             |
| unscraped     | scraped     | scrape *                                                                           |
| gathered      | spread      | apply *                                                                            |
| unfolded      | folded      | fold *, bend *                                                                     |
| whole         | separated   | rip *, divide *, break *                                                           |
| unwrapped     | wrapped     | wrap *                                                                             |
| unchecked     | checked     | look *                                                                             |
| folded        | unfolded    | unroll *                                                                           |
| unarranged    | arranged    | form *, sort *                                                                     |
| grasped       | hanged      | hang *                                                                             |
| unsprinkled   | sprinkled   | sprinkle *                                                                         |
| unsprayed     | sprayed     | spray *                                                                            |

Table A4. Annotated adjective labels for action labels in EPIC-100 dataset (2/2).

| <b>Initial state</b> | <b>Final state</b> | <b>Action labels</b>                                                                       |
|----------------------|--------------------|--------------------------------------------------------------------------------------------|
| unheated             | heated             | cook *, bake *                                                                             |
| separated            | mixed              | add *                                                                                      |
| unrolled             | rolled             | roll *                                                                                     |
| uncrushed            | crushed            | crush *                                                                                    |
| mixed                | mixed              | knead *                                                                                    |
| unset                | set                | set *                                                                                      |
| untouched            | touched            | feel *                                                                                     |
| unrubbed             | rubbed             | rub *                                                                                      |
| unimmersed           | immersed           | soak *                                                                                     |
| unsharpened          | sharpened          | sharpen *                                                                                  |
| grasped              | dropped            | drop *                                                                                     |
| dried                | wet                | water *                                                                                    |
| spread               | gathered           | gather *                                                                                   |
| unattached           | attached           | attach *                                                                                   |
| strong               | weak               | turn-down *, lower *                                                                       |
| undipped             | dipped             | coat *                                                                                     |
| unequipped           | equipped           | wear *                                                                                     |
| weak                 | strong             | increase *                                                                                 |
| tightened            | loosed             | unscrew *                                                                                  |
| whole                | grated             | grate *                                                                                    |
| loosed               | tightened          | screw *                                                                                    |
| worked               | stopped            | finish *                                                                                   |
| unpierced            | pierced            | stab *                                                                                     |
| unserved             | served             | serve *                                                                                    |
| wrapped              | unwrapped          | uncover *, unwrap *                                                                        |
| unlocked             | locked             | lock *                                                                                     |
| unflatten            | flatten            | flatten *                                                                                  |
| unseasoned           | seasoned           | season *                                                                                   |
| locked               | unlocked           | unlock *                                                                                   |
| unmarked             | marked             | mark *                                                                                     |
| frozen               | unfrozen           | unfreeze *                                                                                 |
| none                 | none               | switch *, prepare *, choose *, wait *, search *, transition *, smell *, measure *, check * |
